# Supplementary material for: Assessment of Phenotype Relevant Amino Acid Residues in TEM-β-Lactamases by Mathematical Modelling and Experimental Approval
Source: MDPI journal article supplement (doi:10.3390/microorganisms9081726), 2021-08-13
Supplement: s1 [file s1]

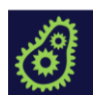

**Table S1.** Primers used in this study.

| Name               | Sequence 5'→3'                        |
|--------------------|---------------------------------------|
| <b>mutagenesis</b> |                                       |
| AT-L40V-GTG-for    | GATGCTGAAGATCAGGTGGGTGCACGAGTGG       |
| AT-L40V-GTG-rev    | CCACTCGTGCACCCACCTGATCTTCAGCATC       |
| SN-M/I69-ATT-for   | GAACGTTTTCCAATGATTAGCACTTTTAAAGTTCTG  |
| SN-M/I69-ATT-rev   | CAGAACTTTAAAAGTGCTAATCATTGGAAAACGTTTC |
| SN-M/L69-CTG-for   | GAACGTTTTCCAATGCTGAGCACTTTTAAAGTTCTG  |
| SN-M/L69-CTG-rev   | CAGAACTTTAAAAGTGCTCAGCATTGGAAAACGTTTC |
| SN-M/V69-GTG-for   | GAACGTTTTCCAATGGTGAGCACTTTTAAAGTTCTG  |
| SN-M/V69-GTG-rev   | CAGAACTTTAAAAGTGCTCACCATTGGAAAACGTTTC |
| AT-N100S-AGT-for   | TCAACCAAGTCACTCTGAGAATAGTGTATGCCGCGA  |
| AT-N100S-AGT-rev   | TCGCCGCATACACTATTCTCAGAGTGACTTGTTGA   |
| SN-E/K104-AAG-for  | CAGAATGACTTGTTAAGTACTCACCAGTCACAG     |
| SN-E/K104-AAG-rev  | CTGTGACTGGTGAGTACTTAACCAAGTCATTCTG    |
| AT-S/G130-GGT-for  | GTGCTGCCATAACCATGGGTGATAACACTGCTGCC   |
| AT-S/G130-GGT-rev  | GGCAGCAGTGTTATCACCCATGGTTATGGCAGCAC   |
| S130T-AGT:ACT-FOR  | CAGTGCTGCCATAACCATGACTGATAACACTGC     |
| S130T-AGT:ACT-REV  | GTTGGCCGCAGTGTTATCAGTCATGGTTATGG      |
| AT-R/C164-TGT-for  | GTAACCTCGCCTTGATTGTTGGGAACCGGAGC      |
| AT-R/C164-TGT-rev  | GCTCCGGTTCCCAACAATCAAGGCGAGTTAC       |
| AT-R/H164-CAT-for  | GTAACCTCGCCTTGATCATTGGGAACCGGAGCTG    |
| AT-R/H164-CAT-rev  | CAGCTCCGGTTCCCAATGATCAAGGCGAGTTAC     |
| AT-R/S164-AGT-for  | GTAACCTCGCCTTGATAGTTGGGAACCGGAGC      |
| AT-R/S164-AGT-rev  | GCTCCGGTTCCCAACTATCAAGGCGAGTTAC       |
| AT-W/C165-TGT-FOR  | CTCGCCTTGATCGTTGTGAACCGGAGCTGAATG     |
| AT-W/C165-TGT-REV  | CATTGAGCTCCGGTTCACAACGATCAAGGCGAG     |
| AT-W/G165-GGG-FOR  | CATGTAACCTCGCCTTGATCGTGGGAACCGGAG     |
| AT-W/G165-GGG-REV  | CTCCGGTTCCCCACGATCAAGGCGAGTTACATG     |
| AT-W/L165-TTG-for  | GTAACCTCGCCTTGATCGTTTGGGAACCGGAGC     |

|                    |                                                 |
|--------------------|-------------------------------------------------|
| AT-W/L165-TTG-rev  | GCTCCGGTTCCAAACGATCAAGGCGAGTTAC                 |
| AT-W/R165-CGG-for  | CATGTAACCTCGCCTTGATCGTCGGAACCGGAG               |
| AT-W/R165-CGG-rev  | CTCCGGTTCCCGACGATCAAGGCGAGTTACATG               |
| D179E-GAC:GAG-for  | TACCAAACGACGAGCGTGAGACCACGATGC                  |
| D179E-GAC:GAG-rev  | GCATCGTGGTCTCACGCTCGTCGTTTGGTA                  |
| M182T-ATG:ACG-for  | GAGCGTGACACCACGACGCCTGCAGCAAT                   |
| M182T-ATG:ACG-rev  | ATTGCTGCAGGCGTCGTGGTGTCACGCTC                   |
| L221M-CTG:ATG-for  | GATAAAGTTGCAGGACCACTTATGCGCTCGGCC               |
| L221M-CTG:ATG-rev  | GGCCGAGCGCATAAGTGGTCCTGCAACTTTATC               |
| AT-G/S238-AGT-for  | GATAAATCTGGAGCCAGTGAGCGTGGGTCTC                 |
| AT-G/S238-AGT-rev  | GAGACCCACGCTCACTGGCTCCAGATTTATC                 |
| AT-G/R-238-CGT-for | GATAAATCTGGAGCCCGTGAGCGTGGGTCTC                 |
| AT-G/R-238-CGT-rev | GAGACCCACGCTCACGGGCTCCAGATTTATC                 |
| AT-E/G-240-GGG-for | CTGGAGCCGGTGGGCGTGGGTCTCG                       |
| AT-E/G-240-GGG-rev | CGAGACCCACGCCCACCGGCTCCAG                       |
| AT-E/K240-AAG-for  | ATCTGGAGCCGGTAAGCGTGGGTCTC                      |
| AT-E/K240-AAG-rev  | GAGACCCACGCTTACCGGCTCCAGAT                      |
| AT-E/R-240-AGG-FOR | TGCTGATAAATCTGGAGCCGGTAGGCGTGGGTCTCG            |
| AT-E/R-240-AGG-REV | CGAGACCCACGCCTACCGGCTCCAGATTTATCAGCA            |
| AT-E/V-240-GTG-for | CTGGAGCCGGTGTGCGTGGGTCTCG                       |
| AT-E/V-240-GTG-rev | CGAGACCCACGCACACCGGCTCCAG                       |
| AT-R/C-244-TGC-for | CCGGTGAGCGTGGGTCTTGCGGTATCA                     |
| AT-R/C-244-TGC-rev | TGATACCGCAAGACCCACGCTCACCGG                     |
| AT-R/G-241-GGC-FOR | CCGGTGAGCGTGGGTCTGGCGGTATCA                     |
| AT-R/G-241-GGC-REV | TGATACCGCCAGACCCACGCTCACCGG                     |
| AT-R/H-244-CAC-for | GTGAGCGTGGGTCTCACGGTATCATTGCAGC                 |
| AT-R/H-244-CAC-rev | GCTGCAATGATACCGTGAGACCCACGCTCAC                 |
| AT-R/L-244-CTC-FOR | GTGAGCGTGGGTCTCTCGGTATCATTGCAGC                 |
| AT-R/L-244-CTC-REV | GCTGCAATGATACCGAGAGACCCACGCTCAC                 |
| SN-R/S244-AGC-for  | GAGCGTGGGTCTAGCGGTATCATTGCAG                    |
| SN-R/S244-AGC-rev  | CTGCAATGATACCGCTAGACCCACGCTC                    |
| AT-T265M-ATG-FOR   | CCGTATCGTAGTTATCTACATGACGGGGAGTCAG              |
| AT-T265M-ATG-REV   | CTGACTCCCCGTGATGATAGATAACTACGATACGG             |
| AT-R/A275-GCA-FOR  | TCAGGCAACTATGGATGAAGCAAATAGACAGATCGCTGAG        |
| AT-R/A275-GCA-REV  | CTCAGCGATCTGTCTATTTGCTTCATCCATAGTTGCCTGA        |
| AT-R/L275-CTA-for  | CAGGCAACTATGGATGAAGTAAATAGACAGATCGCTGAG         |
| AT-R/L275-CTA-rev  | CTCAGCGATCTGTCTATTTAGTTTCATCCATAGTTGCCTG        |
| AT-R/Q275-CAA-for  | CAGGCAACTATGGATGAACAAAATAGACAGATCGCTGAG         |
| AT-R/Q275-CAA-rev  | CTCAGCGATCTGTCTATTTTGTTCATCCATAGTTGCCTG         |
| SN-N/D276-GAT-for  | CTATGGATGAACGAGATAGACAGATCGCTG                  |
| SN-N/D276-GAT-rev  | CAGCGATCTGTCTATCTCGTTCATCCATAG                  |
| I279T-ATC:ACC-for  | ACTATGGATGAACGAAATAGACAGACCGCTGAGATAGGT         |
| I279T-ATC:ACC-rev  | ACCTATCTCAGCGGTCTGTCTATTTGTTTCATCCATAGT         |
| SM_TEM_PaPb_for    | TGACATTAACCTATAAAAATAAGCGTATCACGAGGCCCTTTC      |
| SM_TEM_PaPb_rev    | GAAAGGGCCTCGTGATACGCTTATTTTATAGGTTAATGTCA       |
| SM_TEM_P4_for      | ATTTACCAGGGTTATTGTATCATGAGCGGATACATATTTGAATGTA  |
| SM_TEM_P4_rev      | TACATTCAAATATGTATCCGCTCATGATACAATAACCCTGG-TAAAT |

|                                  |                                                       |
|----------------------------------|-------------------------------------------------------|
| SM_TEM_P5_for                    | CTCATGAGCGGATACATATTTCAATGTATTTAGAAAAA-TAAACAAATAGGGG |
| SM_TEM_P5_rev                    | CCCCTATTTGTTTATTTTCTAAATACATTGAAA-TATGTATCCGCTCATGAG  |
| <b>sequencing</b>                |                                                       |
| M13 Forward                      | GTAAAACGACGGCCAG                                      |
| M13 Reverse                      | CAGGAAACAGCTATGAC                                     |
| <b>amplification for cloning</b> |                                                       |
| TEM1-P-XhoI-for                  | GGAAATTGCTCGAGAGCTCAGTATTGC                           |
| TEM1-XbaI-rev                    | GAGTAAACTTGGTCTAGAAGTTACCAATGC                        |
| <b>expression analysis</b>       |                                                       |
| SN-tem1-stop-T-rev               | GGTCTGACAGTTACCAATGCTTAATC                            |
| SN-tem1-P-for                    | GCTCAGTATTGCCCCGCTCCA                                 |

**Table S2.** Antibiotics and their solvents used in this study

| Name                                        | Solvent                       | Provider                                        |
|---------------------------------------------|-------------------------------|-------------------------------------------------|
| Amoxicillin                                 | DMSO                          | TCI Deutschland GmbH, Eschborn, Germany         |
| Ampicillin Sodium Salt                      | water                         | Carl Roth GmbH & Co.KG., Karlsruhe, Germany     |
| Avibactam Sodium                            | DMSO                          | Advanced ChemBlocks Inc., Burlingame, USA       |
| Aztreonam                                   | satured NaHCO <sub>3</sub>    | Sigma Aldrich Chemie GmbH, Taufkirchen, Germany |
| Cefepime hydrochloride                      | phosphate buffer 0.1 M pH 6   | TCI Deutschland GmbH, Eschborn, Germany         |
| Cefotaxime sodium salt                      | water                         | TCI Deutschland GmbH, Eschborn, Germany         |
| Ceftazidime hydrate                         | 0.9 % NaCl                    | Sigma Aldrich Chemie GmbH, Taufkirchen, Germany |
| Ceftriaxone disodium salt, hemiheptahydrate | water                         | TCI Deutschland GmbH, Eschborn, Germany         |
| Ceftobiprole                                | DMSO                          | Basilea Pharmaceutica AG                        |
| Piperacillin sodium salt                    | water                         | Sigma Aldrich Chemie GmbH, Taufkirchen, Germany |
| Potassium clavulanate                       | water                         | Sigma Aldrich Chemie GmbH, Taufkirchen, Germany |
| Sulbactam                                   | phosphate buffer 0,1 M pH 7.2 | Sigma Aldrich Chemie GmbH, Taufkirchen, Germany |
| Tazobactam                                  | DMSO                          | Sigma Aldrich Chemie GmbH, Taufkirchen, Germany |
| Tetracycline hydrochloride                  | water                         | AppliChem GmbH, Darmstadt, Germany              |

**Table S3.** Strains and plasmids used or generated in this study

| Strain Name                            | Plasmid                          | Description                                                                                                                                                        | Reference            |
|----------------------------------------|----------------------------------|--------------------------------------------------------------------------------------------------------------------------------------------------------------------|----------------------|
| /                                      | pCR <sup>TM</sup> -Blunt II-TOPO | <i>lacZα</i> , <i>ccdB</i> , Kan <sup>R</sup> , Zeo <sup>R</sup> , pUC origin, M13R, SP6 promoter, T7 promoter, M13F                                               | Invitrogen           |
| /                                      | pBT                              | <i>lacZα</i> , <i>tetL</i> , <i>ColE1</i> , M13R, T3, T7 promoter, M13F                                                                                            | Agilent Technologies |
| /                                      | Topo-P3-TEM-1                    | pCR <sup>TM</sup> -Blunt II-TOPO with P3-TEM-1                                                                                                                     | this study           |
| /                                      | pBT-P3-TEM-1                     | pBT with P3-TEM-1 cloned between <i>XhoI</i> and <i>XbaI</i>                                                                                                       | this study           |
| XL1-blue                               | none                             | <i>recA1</i> , <i>endA1</i> , <i>gyrA96</i> , <i>thi-1</i> , <i>hsdR17</i> , <i>supE44</i> , <i>relA1</i> <i>lac[F; proAB, lacIqZΔM15, Tn10 (Tet<sup>R</sup>)]</i> | Agilent Technologies |
| Mach1 <sup>TM</sup> -T1 <sup>R</sup> : | none                             | F-; $\phi 80(lacZ)\Delta M15$ , $\Delta lacX74$ , <i>hsdR(rk-, mk+)</i> , $\Delta recA1398$ , <i>endA1</i> , <i>tonA</i>                                           | Invitrogen           |
| SM-1                                   | Topo-P3-TEM-1                    | derivative of XL1-blue                                                                                                                                             | this study           |
| SM-2                                   | pBT-P3-TEM-1                     | derivative of XL1-blue                                                                                                                                             | this study           |
| JH-02                                  | Topo-P3-TEM-L40V                 | derivative of XL1-blue                                                                                                                                             | this study           |
| HZ-02                                  | Topo-P3-TEM-M69I                 | derivative of XL1-blue                                                                                                                                             | this study           |
| HZ-03                                  | Topo-P3-TEM-M69L                 | derivative of XL1-blue                                                                                                                                             | this study           |
| HZ-04                                  | Topo-P3-TEM-M69V                 | derivative of XL1-blue                                                                                                                                             | this study           |
| HZ-05                                  | Topo-P3-TEM-E104K                | derivative of XL1-blue                                                                                                                                             | this study           |
| JH-04                                  | Topo-P3-TEM-S130G                | derivative of XL1-blue                                                                                                                                             | this study           |
| HD-02                                  | Topo-P3-TEM-S130T                | derivative of XL1-blue                                                                                                                                             | this study           |
| HZ-08                                  | Topo-P3-TEM-R164C                | derivative of XL1-blue                                                                                                                                             | this study           |
| HZ-07                                  | Topo-P3-TEM-R164H                | derivative of XL1-blue                                                                                                                                             | this study           |
| HZ-06                                  | Topo-P3-TEM-R164S                | derivative of XL1-blue                                                                                                                                             | this study           |
| HD-04                                  | Topo-P3-TEM-W165C                | derivative of XL1-blue                                                                                                                                             | this study           |
| HD-03                                  | Topo-P3-TEM-W165G                | derivative of XL1-blue                                                                                                                                             | this study           |
| JH-05                                  | Topo-P3-TEM-W165L                | derivative of XL1-blue                                                                                                                                             | this study           |
| JH-06                                  | Topo-P3-TEM-W165R                | derivative of XL1-blue                                                                                                                                             | this study           |
| HD-14                                  | Topo-P3-TEM-M182T                | derivative of XL1-blue                                                                                                                                             | this study           |
| JH-07                                  | Topo-P3-TEM-G238R                | derivative of XL1-blue                                                                                                                                             | this study           |
| HZ-09                                  | Topo-P3-TEM-G238S                | derivative of XL1-blue                                                                                                                                             | this study           |
| HZ-11                                  | Topo-P3-TEM-E240G                | derivative of XL1-blue                                                                                                                                             | this study           |
| HD-05                                  | Topo-P3-TEM-E240K                | derivative of XL1-blue                                                                                                                                             | this study           |
| HD-06                                  | Topo-P3-TEM-E240R                | derivative of XL1-blue                                                                                                                                             | this study           |
| HD-07                                  | Topo-P3-TEM-E240V                | derivative of XL1-blue                                                                                                                                             | this study           |
| JH-08                                  | Topo-P3-TEM-R244C                | derivative of XL1-blue                                                                                                                                             | this study           |
| HD-08                                  | Topo-P3-TEM-R244G                | derivative of XL1-blue                                                                                                                                             | this study           |
| JH-09                                  | Topo-P3-TEM-R244H                | derivative of XL1-blue                                                                                                                                             | this study           |
| HD-09                                  | Topo-P3-TEM-R244L                | derivative of XL1-blue                                                                                                                                             | this study           |
| HZ-13                                  | Topo-P3-TEM-R244S                | derivative of XL1-blue                                                                                                                                             | this study           |
| HD-10                                  | Topo-P3-TEM-T265M                | derivative of XL1-blue                                                                                                                                             | this study           |
| HD-11                                  | Topo-P3-TEM-R275A                | derivative of XL1-blue                                                                                                                                             | this study           |
| JH-10                                  | Topo-P3-TEM-R275L                | derivative of XL1-blue                                                                                                                                             | this study           |
| JH-11                                  | Topo-P3-TEM-R275Q                | derivative of XL1-blue                                                                                                                                             | this study           |
| HZ-14                                  | Topo-P3-TEM-N276D                | derivative of XL1-blue                                                                                                                                             | this study           |

|       |                         |                        |            |
|-------|-------------------------|------------------------|------------|
| HD-19 | Topo-P3-TEM-L40V+I279T  | derivative of XL1-blue | this study |
| HD-15 | Topo-P3-TEM-D179E+M182T | derivative of XL1-blue | this study |
| HD-16 | Topo-P3-TEM-E104K+M182T | derivative of XL1-blue | this study |
| HD-18 | Topo-P3-TEM-R164C+M182T | derivative of XL1-blue | this study |
| HD-20 | Topo-P3-TEM-R244H+L221M | derivative of XL1-blue | this study |
| HD-23 | Topo-P3-TEM-G238S+T265M | derivative of XL1-blue | this study |
| HD-24 | Topo-P3-TEM-G238S+R275L | derivative of XL1-blue | this study |
| HD-25 | Topo-P3-TEM-M69L+R164H  | derivative of XL1-blue | this study |
| HD-26 | Topo-P3-TEM-M69L+R164S  | derivative of XL1-blue | this study |
| HD-27 | Topo-P3-TEM-M69V+R164H  | derivative of XL1-blue | this study |
| LB01  | Topo-P3-TEM-R164S+R244S | derivative of XL1-blue | this study |
| LB02  | Topo-P3-TEM-R164S+N276D | derivative of XL1-blue | this study |
| LB03  | Topo-P3-TEM-R164H+N276D | derivative of XL1-blue | this study |
| SM05  | pBT-PaPb-TEM-1          | derivative of XL1-blue | this study |
| SM06  | pBT-P4-TEM-1            | derivative of XL1-blue | this study |
| SM07  | pBT-P5-TEM-1            | derivative of XL1-blue | this study |

**Table S4.** Antimicrobial susceptibility testing of the mutants generated in the E. coli XL1-blue background.

|                                   | Ampicillin      | Amoxicillin     | Piperacillin    | Amx.(512)/<br>CLA | Amp.(512)<br>/SUL | Pip.(512)/<br>TAZ | Amp(512)/<br>TAZ | Amp.(512)/<br>Avi | Ceftazidim | Ceftriaxon   | Cefotaxim     | Cefepim  | Ceftobiprol | Aztreonam  |
|-----------------------------------|-----------------|-----------------|-----------------|-------------------|-------------------|-------------------|------------------|-------------------|------------|--------------|---------------|----------|-------------|------------|
| XL1-blue                          | 4               | 4               | 0.5             |                   |                   |                   |                  |                   | 0.25       | 0.06         | 0.06          | 0.06     | 0.06        | 0.06       |
| <b>SM-1 (TEM-1-<br/>pCR-Topo)</b> | <b>&gt;1024</b> | <b>&gt;1024</b> | <b>&gt;1024</b> | <b>8</b>          | <b>256</b>        | <b>2</b>          | <b>32</b>        | <b>1</b>          | <b>2</b>   | <b>0.125</b> | <b>0.0625</b> | <b>1</b> | <b>2</b>    | <b>0.5</b> |
| L40V                              | >1024           | >512            | >1024           | 1                 | 16                | 1                 |                  | 2                 | 0.125      | 0.03125      | 0.0625        | 0.0625   | 0.125       | 0.125      |
| M69I                              | >1024           | >1024           | 1024            | 32                | 64                | 2                 |                  | 1                 | 0.25       | 0.03125      | 0.03125       | 0.03125  | 0.0625      | 0.0625     |
| M69L                              | >1024           | >1024           | >1024           | 64                | 2048              | 16                |                  | 2                 | 0.25       | 0.0625       | 0.0625        | 0.25     | 0.5         | 0.25       |
| M69V                              | >1024           | >1024           | >1024           | 32                | 128               | 4                 |                  | 1                 | 0.25       | 0.03125      | 0.0625        | 0.125    | 0.25        | 0.0625     |
| N100S                             | >1024           | >1024           | >1024           | 8                 | 256               | 8                 |                  | 0.125             | 1          | 0.25         | 0.0625        | 1        | 2           | 1          |
| E104K                             | >1024           | >1024           | >1024           | 4                 | 256               | 4                 |                  | 1                 | 8          | 1            | 0.25          | 2        | 4           | 2          |
| S130G                             | >1024           | >512            | >1024           | 32                | 32                | 8                 |                  | 16                | 0.125      | 0.03125      | 0.0625        | 0.03125  | 0.25        | 0.125      |
| S130T                             | 64              | 256             | 32              |                   |                   |                   |                  |                   | 0.125      | 0.03125      | 0.0625        | 0.03125  | 0.125       | 0.125      |
| R164C                             | >1024           | >1024           | 64              | 2                 | 2                 |                   | 0.25             | 0.0625            | 8          | 0.0625       | 0.0625        | 0.5      | 0.25        | 0.125      |
| R164H                             | >1024           | >1024           | 1024            | 2                 | 8                 | 1                 |                  | 0.5               | 32         | 0.25         | 0.25          | 4        | 2           | 8          |
| R164S                             | >1024           | >1024           | 1024            | 2                 | 2                 | 0.25              |                  | 0.5               | 64         | 1            | 0.5           | 8        | 2           | 8          |
| W165C                             | >1024           | >512            | 1024            | 4                 | 256               | 1                 |                  | 1                 | 1          | 0.0625       | 0.0625        | 0.25     | 0.5         | 0.125      |
| W165G                             | >1024           | >512            | 1024            | 8                 | 64                | 1                 |                  | 1                 | 4          | 0.0625       | 0.0625        | 0.125    | 0.5         | 0.125      |
| W165L                             | >1024           | >512            | 1024            | 16                | 256               | 1                 |                  | 2                 | 2          | 0.03125      | 0.0625        | 0.25     | 0.5         | 0.25       |
| W165R                             | >1024           | >512            | 1024            | 8                 | 128               | 1                 |                  | 2                 | 2          | 0.0625       | 0.0625        | 0.25     | 0.5         | 0.25       |
| M182T                             | >1024           | >512            | >1024           | 8                 | 512               | 2                 |                  | 0.5               | 2          | 0.125        | 0.125         | 2        | 4           | 0.5        |
| G238R                             | >1024           | >512            | >1024           | 8                 | 256               | 2                 |                  | 0.5               | 0.5        | 0.125        | 0.0625        | 1        | 2           | 1          |
| G238S                             | >1024           | >1024           | 512             | 0.25              | 2                 |                   | 1                | 0.125             | 2          | 1            | 2             | 2        | 4           | 0.5        |
| E240G                             | >1024           | >1024           | >1024           | 2                 | 128               | 2                 |                  | 1                 | 4          | 1            | 0.5           | 8        | 16          | 4          |
| E240K                             | >1024           | >512            | >1024           | 4                 | 512               | 16                |                  | 1                 | 4          | 0.25         | 0.125         | 1        | 1           | 1          |
| E240R                             | >1024           | >512            | >1024           | 4                 | 256               | 8                 |                  | 1                 | 8          | 0.25         | 0.125         | 1        | 1           | 1          |
| E240V                             | >1024           | >512            | >1024           | 0.5               | 8                 | 1                 |                  | 0.5               | 2          | 0.125        | 0.0625        | 0.25     | 1           | 0.5        |
| R244C                             | >1024           | >512            | >1024           | 32                | 32                | 1                 |                  | 2                 | 0.125      | 0.03125      | 0.0625        | 0.0625   | 0.0625      | 0.125      |
| R244G                             | >1024           | >512            | >1024           | 32                | 32                | 1                 |                  | 2                 | 0.25       | 0.03125      | 0.0625        | 0.125    | 0.125       | 0.125      |
| R244H                             | >1024           | >512            | >1024           | 32                | 32                | 1                 |                  | 2                 | 0.25       | 0.03125      | 0.0625        | 0.03125  | 0.125       | 0.0625     |
| R244L                             | >1024           | >512            | >1024           | 32                | 32                | 1                 |                  | 1                 | 0.125      | 0.03125      | 0.0625        | 0.03125  | 0.0625      | 0.125      |
| R244S                             | >1024           | >1024           | >1024           | 32                | 128               | 1                 |                  | 4                 | 0.25       | 0.03125      | 0.03125       | 0.125    | 0.0625      | 0.0625     |

|                         |                 |                |                 |          |            |             |   |            |          |              |              |          |            |             |
|-------------------------|-----------------|----------------|-----------------|----------|------------|-------------|---|------------|----------|--------------|--------------|----------|------------|-------------|
| T265M                   | >1024           | >512           | >1024           | 8        | 1024       | 32          |   | 0.5        | 1        | 0.25         | 0.125        | 1        | 2          | 0.5         |
| R275A                   | >1024           | >512           | >1024           | 16       | 256        | 2           |   | 1          | 1        | 0.0625       | 0.0625       | 1        | 1          | 0.125       |
| R275L                   | >1024           | >512           | >1024           | 16       | 512        | 16          |   | 2          | 1        | 0.125        | 0.0625       | 2        | 2          | 0.25        |
| R275Q                   | >1024           | >512           | >1024           | 16       | 512        | 8           |   | 2          | 1        | 0.0625       | 0.0625       | 2        | 2          | 0.125       |
| N276D                   | >1024           | >1024          | >1024           | 32       | 1024       | 32          |   | 2          | 1        | 0.03125      | 0.03125      | 1        | 1          | 0.125       |
| L40V+I279T              | >1024           | >1024          | 256             | 0.5      | 2          |             | 1 | 0.0625     | 0.25     | 0.03125      | 0.0625       | 0.0625   | 0.125      | 0.0625      |
| D179E+M182T             | >1024           | 1024           | 128             | 0.5      | 2          |             | 1 | 0.0625     | 64       | 1            | 0.5          | 4        | 4          | 0.5         |
| E104K+M182T             | >1024           | >1024          | >1024           | 4        | 256        | 0.5         |   | 0.5        | 16       | 1            | 0.5          | 2        | 4          | 2           |
| R164C+M182T             | >1024           | >1024          | 1024            | 0.5      | 2          | 0.125       |   | 0.25       | 64       | 2            | 0.5          | 16       | 8          | 2           |
| R244H+L221M             | >1024           | >1024          | >1024           | 4        | 2          | 0.125       |   | 0.5        | 0.125    | 0.03125      | 0.0625       | 0.03125  | 0.0625     | 0.0625      |
| G238S+T265M             | >1024           | >1024          | 1024            | 0.5      | 2          | 0.125       |   | 0.25       | 2        | 16           | 8            | 4        | 8          | 1           |
| G238S+R275L             | >1024           | >1024          | >1024           | 0.5      | 4          | 0.125       |   | 0.25       | 4        | 8            | 4            | 8        | 16         | 1           |
| M69L+R164H              | >1024           | >1024          | >1024           | 8        | 16         | 0.125       |   | 1          | 16       | 0.25         | 0.25         | 2        | 0.5        | 0.5         |
| M69L+R164S              | >1024           | >1024          | 512             | 2        | 8          |             | 1 | 0.5        | 32       | 0.5          | 0.5          | 8        | 0.5        | 1           |
| M69V+R164H              | >1024           | >1024          | 256             | 1        | 2          |             | 1 | 0.25       | 2        | 0.0625       | 0.0625       | 0.25     | 0.125      | 0.125       |
| R164S-R244S             | >1024           | >512           | 512             | 16       | 8          |             | 4 | 2          | 1        | 0.0625       | 0.0625       | 2        | 0.125      | 0.5         |
| R164S-N276D             | >1024           | >512           | 512             | 2        | 2          |             | 2 | 0.125      | 128      | 0.25         | 0.125        | 16       | 1          | 2           |
| R164H-N276D             | >1024           | >512           | 512             | 2        | 2          |             | 4 | 0.125      | 32       | 0.125        | 0.125        | 4        | 1          | 1           |
| <b>SM-2 (TEM-1-pBT)</b> | <b>&gt;1024</b> | <b>&gt;512</b> | <b>&gt;1024</b> | <b>2</b> | <b>128</b> | <b>0.25</b> |   | <b>0.5</b> | <b>1</b> | <b>0.125</b> | <b>0.125</b> | <b>1</b> | <b>0.5</b> | <b>0.25</b> |
| Pa/Pb                   | >1024           | >512           | >1024           | 8        | 256        | 16          |   | 1          | 1        | 0.125        | 0.0625       | 1        | 2          | 0.25        |
| P4                      | >1024           | >512           | >1024           | 8        | 256        | 16          |   | 1          | 2        | 0.25         | 0.125        | 1        | 4          | 0.5         |
| P5                      | >1024           | >512           | >1024           | 4        | 256        | 8           |   | 0.5        | 1        | 0.125        | 0.0625       | 1        | 2          | 0.25        |

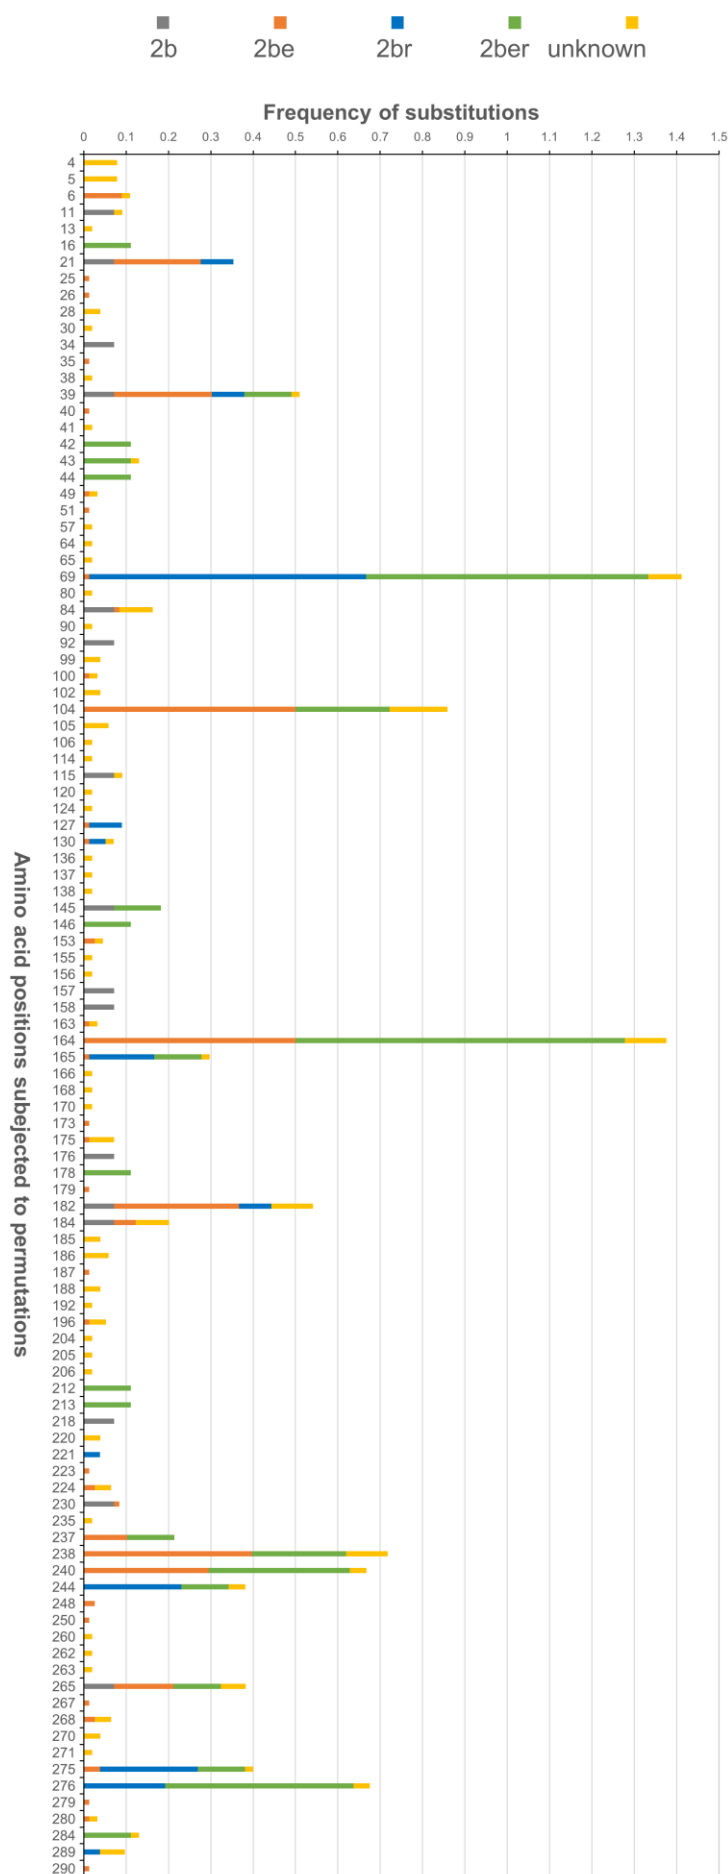

**Figure S1.** Frequency of amino acids substitutions in the TEM variants associated with a specific phenotype: 2b, 2be, 2br and 2ber, Mutational frequency in unknown variants are indicated as well. (Data as of 2017)



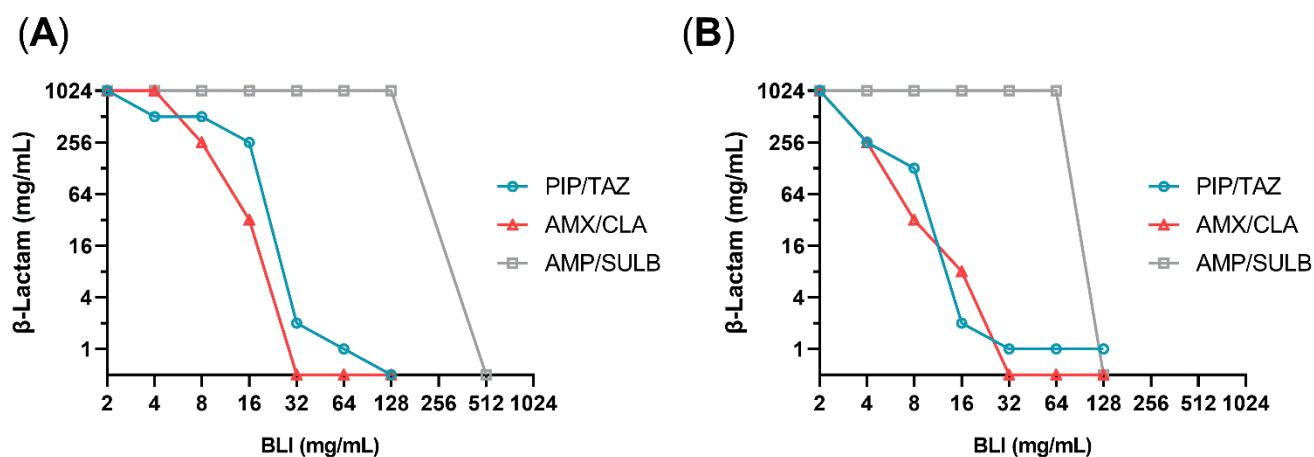

**Figure S2.** Isoboles of  $\beta$ -lactams combined with BLIs determined for (A) SM-1 and (B) SM-2. The curves represent the combined concentrations of the first nonturbid well in a checkerboard assay.

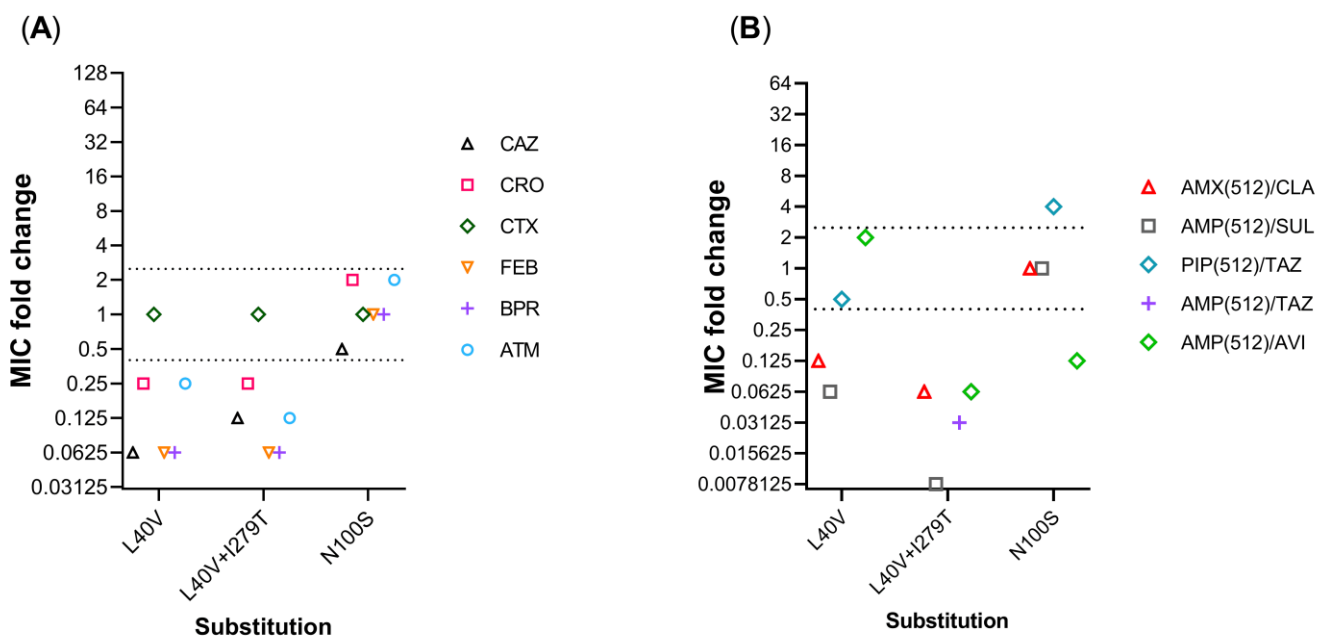

**Figure S3.** Changes in MIC of some “special cases” of mutations compared to the parenteral strain (SM-1) against (A) cephalosporins and aztreonam, or for (B) penicillin/BLI combinations.
